# Supplementary material for: Metal-Assisted Injection Spinning of Ultra Strong Fibers from Megamolecular LC Polysaccharides
Source: MDPI journal article supplement (doi:10.3390/polym16081099), 2024-04-15
Supplement: s1 [file s1]

# Metal-Assisted Injection Spinning of Ultra Strong Fibers from Megamolecular LC Polysaccharides

Mohammad Asif Ali <sup>1,2,†</sup>, Maninder Singh <sup>2,†</sup>, Shuo Zhang <sup>2</sup>, Daisaku Kaneko <sup>1,2</sup>, Maiko Kaneko Okajima <sup>1,2,\*</sup> and Tatsuo Kaneko <sup>1,2,\*</sup>

<sup>1</sup> Key Laboratory of Synthetic and Biological Colloids, Ministry of Education, School of Chemical and Material Engineering, Jiangnan University, 1800 Lihu Ave, Wuxi 214122, China; asifali@jiangnan.edu.cn (M.A.A.); daisaku.kaneko@hotmail.com (D.K.)

<sup>2</sup> Graduate School of Advanced Science and Technology, Japan Advanced Institute of Science and Technologies, 1-1 Asahidai, Nomi 923-1292, Ishikawa, Japan; msmanin22@gmail.com (M.S.); tyouseki1215@163.com (S.Z.)

\* Correspondence: maiko@jiangnan.edu.cn (M.K.O.); tkaneko@jiangnan.edu.cn (T.K.)

† These authors contributed equally to this work.

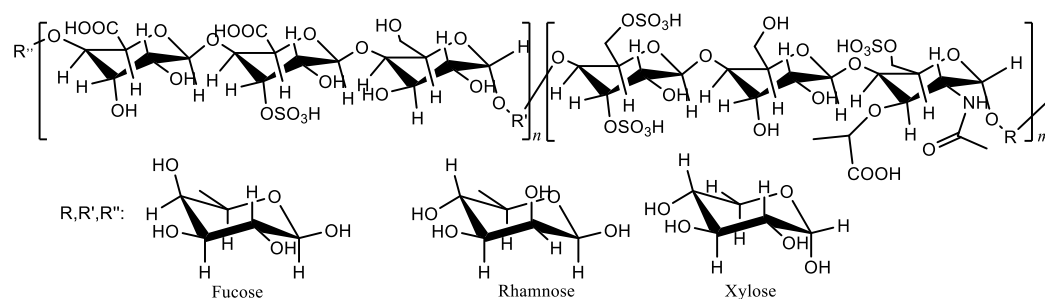

**Figure S1.** Main structure of sacran which is a supergiant liquid crystalline sulfated polysaccharide.

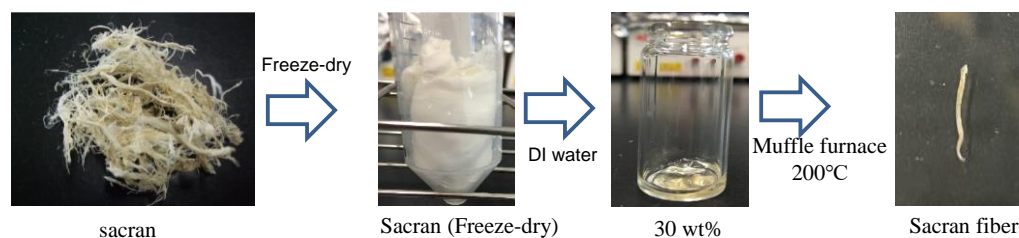

**Figure S2.** Preparation trial of sacran fibers by dry-spinning in 200 °C atmosphere from 30wt% aqueous solution.

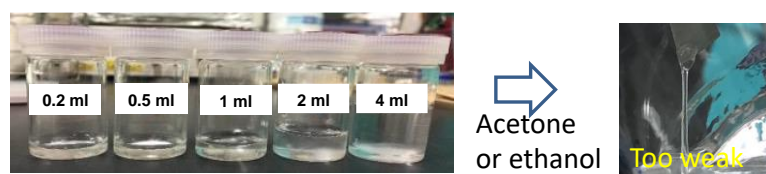

**Figure S3.** Preparation trial of sacran fibers by jelly-state spinning from gradually dehydrated jelly solutions by stepwise addition of acetone into aqueous solution.

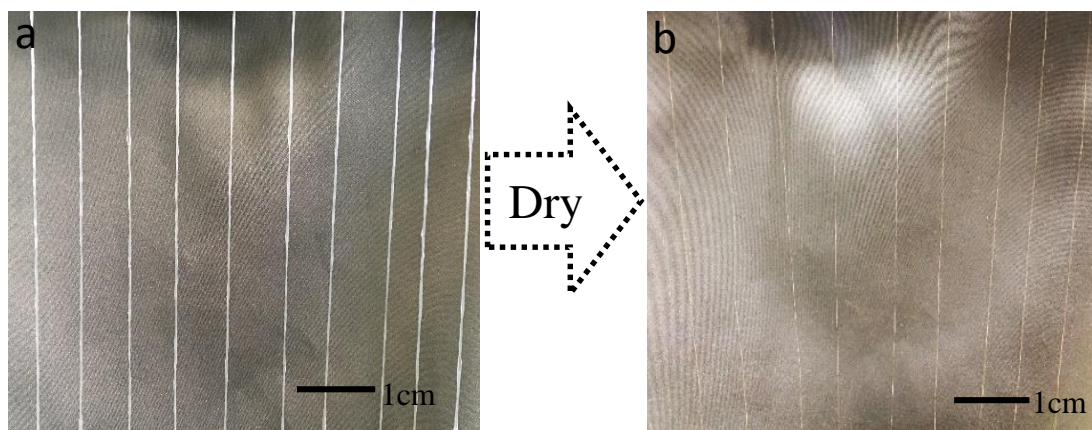

**Figure S4.** Sacran-metal complex fibers. (a) Sacran hydrogel fibers of 0.5wt% sacran aqueous solution cross-linked with 0.01M cerium (III) solution by sacran-metal complexation during injection. (b) Sacran-metal complex fibers formed by drying the hydrogel fibers shown in (a).

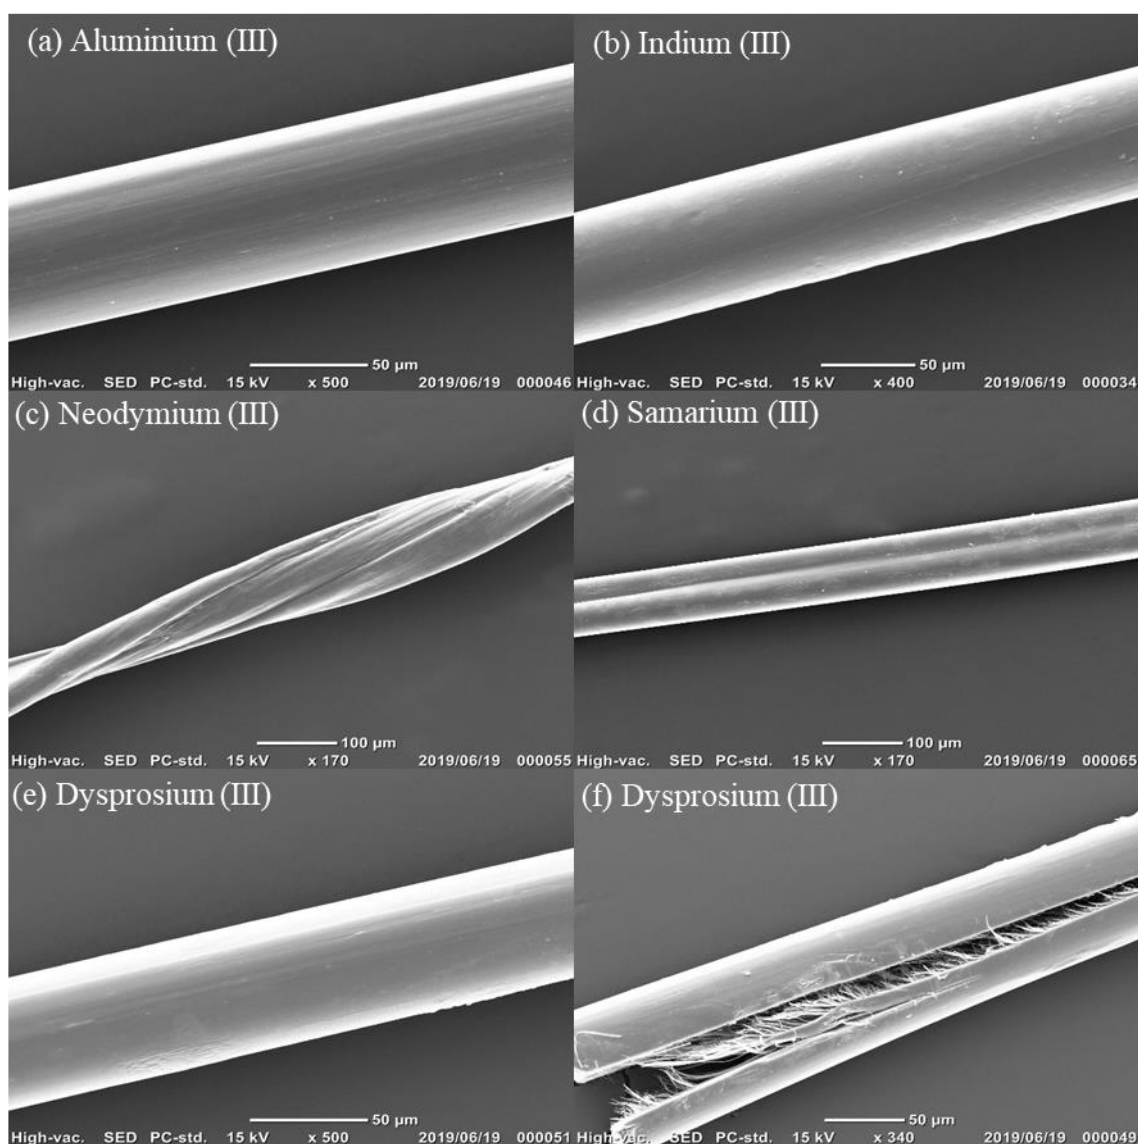

**Figure S5.** Representative SEM images of sacran complex fibers cross-linked with a)  $\text{Al}^{3+}$ , b)  $\text{In}^{3+}$ , c)  $\text{Nd}^{3+}$ , d)  $\text{Sm}^{3+}$ , and e)  $\text{Dy}^{3+}$ , showing the striped texture on the surface. f) Spontaneously-fractured fibers of (e).

**Table S1.** Mechanical properties of sacran complex fibers prepared under different concentration condition of cerium chloride.

| Concentration of cerium<br>(III) chloride solution | Sacran-cerium complex (III) fibers |                 |                       |                          |
|----------------------------------------------------|------------------------------------|-----------------|-----------------------|--------------------------|
|                                                    | $E$ (GPa)                          | $\sigma$ (GPa)  | $\varepsilon$ (mm/mm) | $U$ (kJ/m <sup>3</sup> ) |
| 0.001 M                                            | 1.1 $\pm$ 0.3                      | 0.09 $\pm$ 0.03 | 0.05 $\pm$ 0.02       | 1.96 $\pm$ 1.47          |
| 0.005 M                                            | 2.3 $\pm$ 0.5                      | 0.11 $\pm$ 0.03 | 0.05 $\pm$ 0.02       | 2.92 $\pm$ 1.95          |
| 0.01 M                                             | 5.4 $\pm$ 0.6                      | 0.19 $\pm$ 0.05 | 0.03 $\pm$ 0.01       | 5.55 $\pm$ 2.06          |
| 0.05 M                                             | 2.9 $\pm$ 0.7                      | 0.09 $\pm$ 0.01 | 0.03 $\pm$ 0.01       | 1.83 $\pm$ 0.61          |
| 0.1 M                                              | 1.9 $\pm$ 0.4                      | 0.08 $\pm$ 0.01 | 0.03 $\pm$ 0.01       | 1.65 $\pm$ 0.39          |

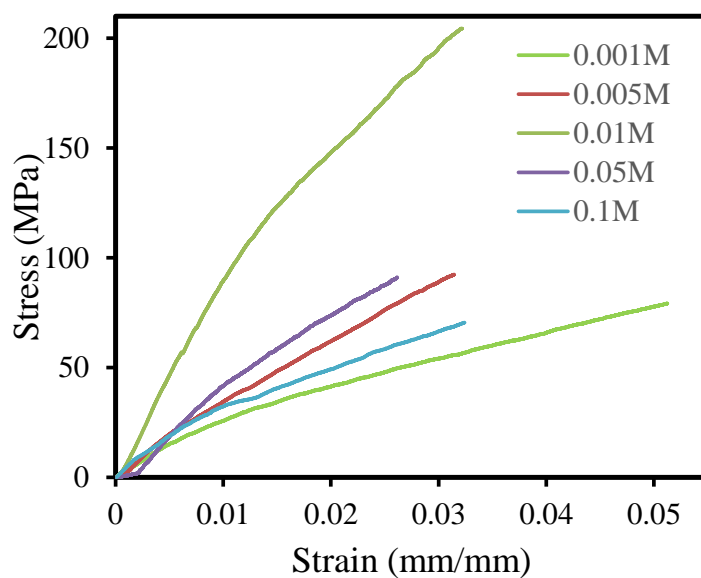

**Figure S6.** Stress-strain curve of sacran complex fibers prepared under different concentration condition of cerium chloride.

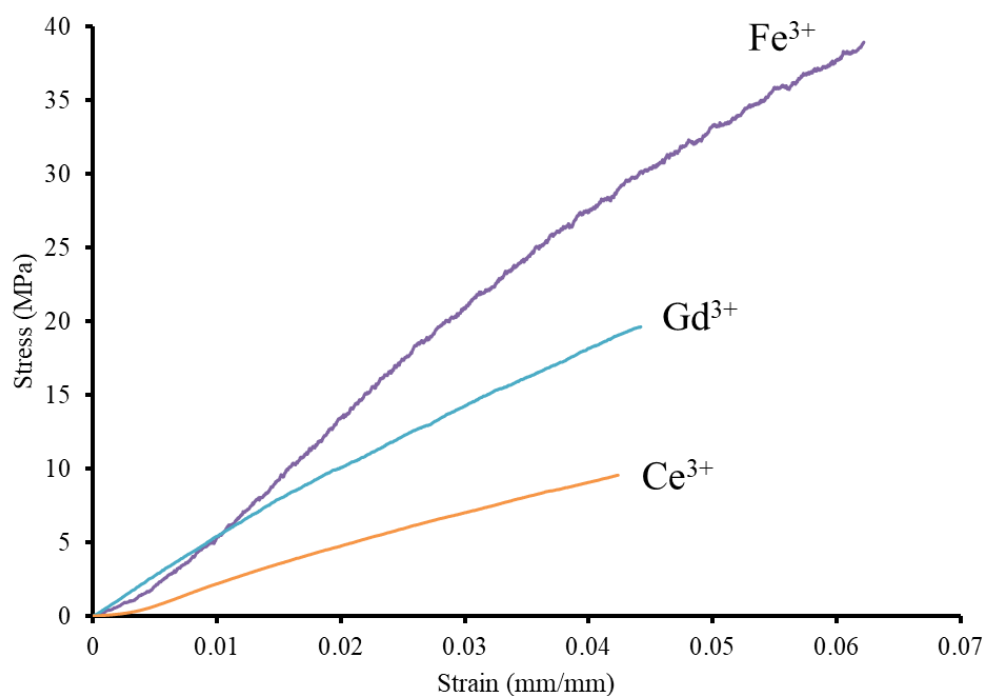

**Figure S7.** Stress-strain curves of sacran-metal complex hydrogel fibers prepared by metal-mediated injection spinning using Ce<sup>3+</sup>, Gd<sup>3+</sup>, and Fe<sup>3+</sup>.
